# Supplementary material for: MiR-191 inhibit angiogenesis after acute ischemic stroke targeting VEZF1
Source: Aging (Albany NY). 2019 May 7;11(9):2762–86. doi: 10.18632/aging.101948 (PMC6535071; doi:10.18632/aging.101948)
Supplement: Supplementary Figures [file aging-11-101948-s001.pdf]

## SUPPLEMENTARY FIGURES

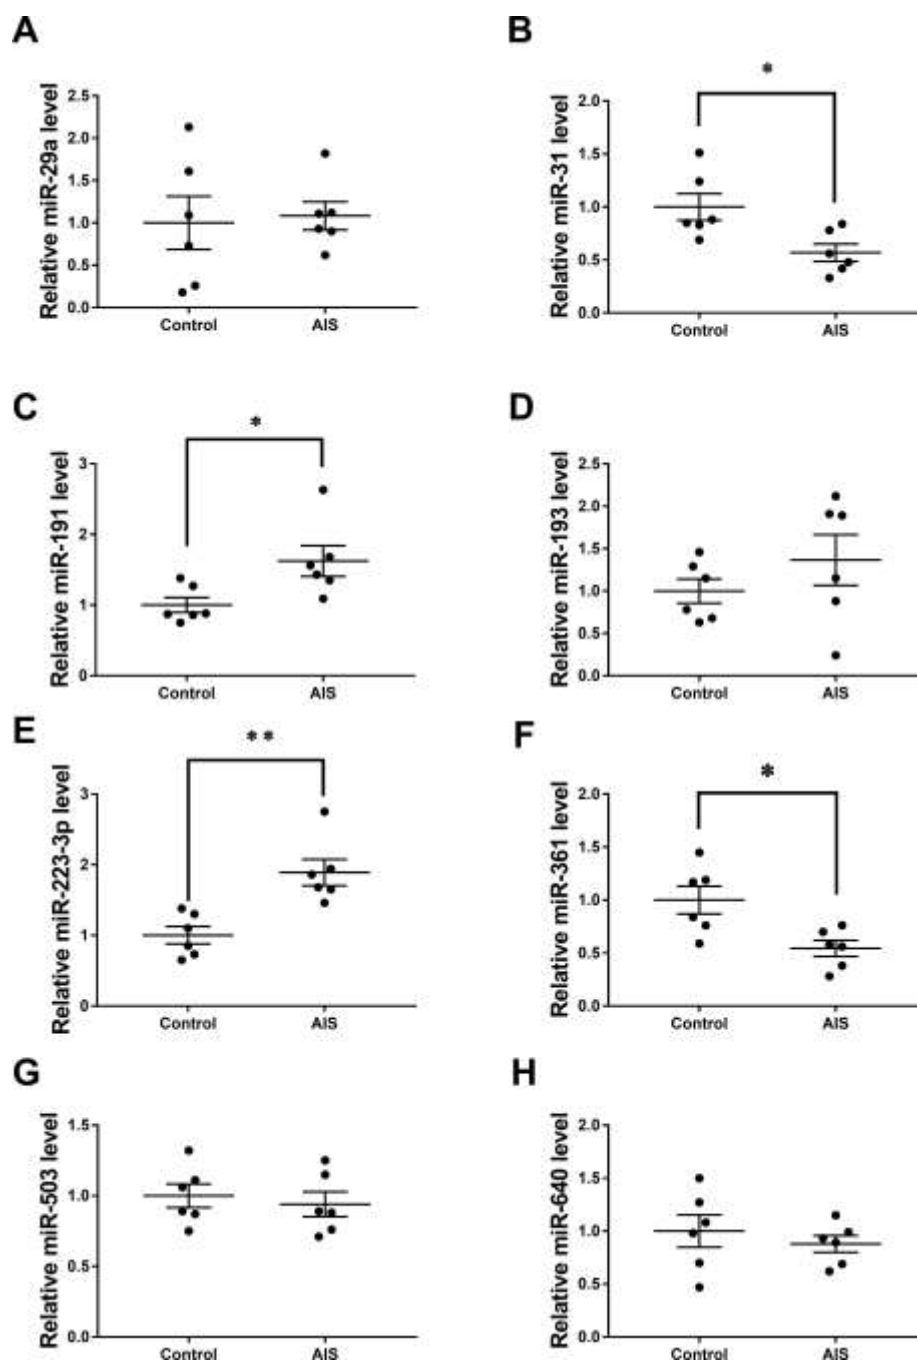

**Supplementary Figure 1. Relative miRNAs levels.** Expression levels of miRNAs in Cohort A (n=6) (A) miR-29a, (B) miR-31, (C) miR-191, (D) miR-193, (E) miR-223-3p, (F) miR-361, (G) miR-503, (H) miR-640.

## 伦理审查批准件

项目伦审编号: 2018-SR-25

|                                                                                                                                                                                                                                                                                                                                                                        |                                                                                          |       |                                                                           |
|------------------------------------------------------------------------------------------------------------------------------------------------------------------------------------------------------------------------------------------------------------------------------------------------------------------------------------------------------------------------|------------------------------------------------------------------------------------------|-------|---------------------------------------------------------------------------|
| 试验项目名称                                                                                                                                                                                                                                                                                                                                                                 | 急性脑梗死患者外周血 miR-191 异常表达的作用及机制研究                                                          |       |                                                                           |
| 药物类别/期别                                                                                                                                                                                                                                                                                                                                                                | 临床科研                                                                                     | 申请专业  | 老年医学科                                                                     |
| 申办单位                                                                                                                                                                                                                                                                                                                                                                   | 南京医科大学附属逸夫医院                                                                             | 组长单位  |                                                                           |
| 专业负责人                                                                                                                                                                                                                                                                                                                                                                  | 鲁翔                                                                                       | 职务/职称 | 主任医师                                                                      |
| 主要研究者                                                                                                                                                                                                                                                                                                                                                                  | 鲁翔                                                                                       | 职务/职称 | 主任医师                                                                      |
| 审查材料                                                                                                                                                                                                                                                                                                                                                                   | 试验方案: V1.0; 版本日期: 2018 年 12 月 10 日; 知情同意书: 版本号: 02, 版本日期: 2018 年 12 月 28 日; 研究者履历及参加人员列表 | 审查途径  | <input checked="" type="checkbox"/> 会议审查<br><input type="checkbox"/> 快速审查 |
| 本伦理委员会<br>联系方式                                                                                                                                                                                                                                                                                                                                                         | 地址: 南京市龙眠大道 109 号南京医科大学附属逸夫医院<br>电话: 025-87115593 邮箱: IRB@njmu.edu.cn                    |       |                                                                           |
| 伦理委员会<br>列席人员签名                                                                                                                                                                                                                                                                                                                                                        | 详见附表                                                                                     |       |                                                                           |
| 伦理委员会审评意见                                                                                                                                                                                                                                                                                                                                                              |                                                                                          |       |                                                                           |
| <p>经本伦理委员会审查, 同意进行该项临床试验。</p> <p>意见及建议: <input checked="" type="checkbox"/> 无 <input type="checkbox"/> 有</p> <p>该研究的进行过程中将受伦理委员会的持续审查? <input checked="" type="checkbox"/> 是 <input type="checkbox"/> 否</p> <p>审查频度为研究批准之日起: <input type="checkbox"/> 3 个月 <input type="checkbox"/> 6 个月 <input checked="" type="checkbox"/> 1 年</p> <p>伦理审查委员会有权根据实际进展情况改变持续审查频度。</p> |                                                                                          |       |                                                                           |
| <p>主任委员签名: 2018.12.01</p> <p>南京医科大学附属逸夫医院 伦理委员会</p>                                                                                                                                                                                                                                                                                                                    |                                                                                          |       |                                                                           |

Supplementary Figure 2. Ethical approval of Ethics Committee of Sir Run Run Hospital, Nanjing Medical University (Protocol Numbers: 2018-SR-25)

# 动物实验伦理审查同意书

Affidavit of Approval of Animal Ethical and Welfare

|      |       |              |               |
|------|-------|--------------|---------------|
| 申请编号 | 11586 | 批准编号         | IACUC-1806010 |
|      |       | Approval No. |               |

本《动物实验方案》经过实验动物伦理委员会审核，符合动物保护、动物福利和伦理原则，符合国家实验动物福利伦理的相关规定。方案的相关信息如下：

The animal use protocol listed below has been reviewed and approved by the Animal Ethical and Welfare Committee(AEWC).

|                                 |                                                                                                                           |                                          |                       |                          |                       |
|---------------------------------|---------------------------------------------------------------------------------------------------------------------------|------------------------------------------|-----------------------|--------------------------|-----------------------|
| 实验名称<br>Protocol Title          | 大鼠大脑中动脉栓塞 (MCAO) 模型miRNA表达的研究<br>Expression of miRNAs in middle cerebral artery occlusion(MCAO)                           |                                          |                       |                          |                       |
| 申请人姓名<br>Applicant              | 杜康<br>Du Kang                                                                                                             | 职称/学位<br>Title/Degree                    | 博士研究生<br>phD. student | 邮箱<br>Email              | dukang@njmu.edu.cn    |
| 实验负责人<br>Principal Investigator | 鲁翔<br>Lu Xiang                                                                                                            | 职称/学位<br>Title/Degree                    | 教授<br>professor       | 邮箱<br>Email              | luxiang66@njmu.edu.cn |
| 院系(部门)<br>Department            | 附属逸夫医院老年医学科<br>Department of Geriatrics, Sir Run Run Hospital, Nanjing Medical University                                 |                                          |                       | 申请日期<br>Application Date | 2018-06-06            |
| 拟实验时间<br>Period of Protocol     | 2018-07-01<br>-<br>2020-06-01                                                                                             | 实验动物使用许可证<br>Number of Animal Use Permit |                       | SYXK(苏)2016-0016         |                       |
| 审核意见<br>Results of Inspection   | <input checked="" type="checkbox"/> 符合动物福利伦理要求，可以进行实验。 Agree<br><input type="checkbox"/> 调整方案后，可以进行实验。 Agree after modify |                                          |                       |                          |                       |
| 兽医<br>Chief Veterinary Officer  | 张春华<br>Zhang Chunhua                                                                                                      |                                          |                       | 日期<br>Date               | 2018.6.15             |

南京医科大学实验动物福利伦理审查委员会  
Animal Ethical and Welfare Committee of N.M.U.

主席(Chairman): 施爱民

日期(Date): 2018-06-15

地址: 中国南京天元东路818号南京医科大学 邮编: 211106  
Add: Tianyuan East Road 818, Nanjing Medical University, Nanjing, Jiangsu Province, P. R. China

1/11

Supplementary Figure 3. Ethical approval of Animal Ethical and Welfare Committee of Nanjing Medical University (Protocol Numbers: IACUC-1806010).

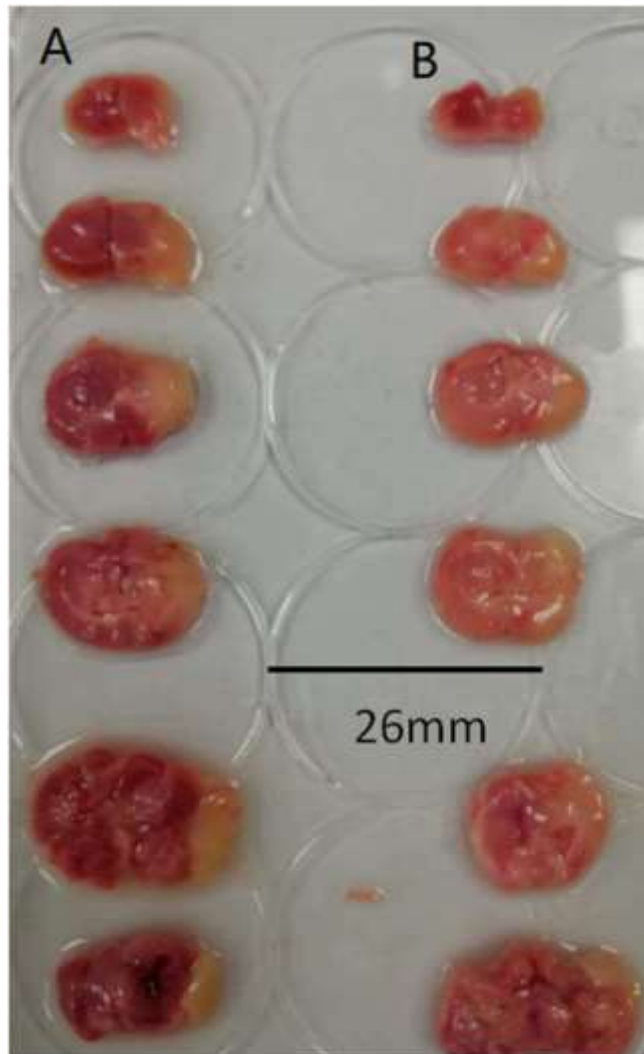

Supplementary Figure 4. TTC staining of the brains of rats MCAO.
